# Supplementary material
Source: PubMed Central journal article supplement (PMC3427125)
Supplement: 1121309109_pnas.201121309SI.pdf [file 1121309109_pnas.201121309SI.pdf]

# Supporting Information

Shaw et al. 10.1073/pnas.1121309109

A.  
16:0-20:4 PC (1-palmitoyl-2-arachidonoyl-sn-glycero-3-phosphocholine) (PAPC):

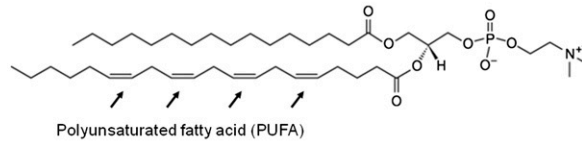

B.  
1-palmitoyl-2-(5'-oxo-valeroyl)-sn-glycero-3-phosphocholine (POVPC):

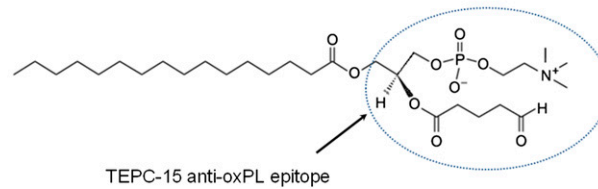

**Fig. S1.** Structures of native (A) and oxidized phosphatidylcholine (B). Polyunsaturated fatty acid chains in phosphatidylcholine, the most abundant phospholipids in the retina, are highly prone to oxidative stress that results in the breaking down of ethylene double bonds and changes the conformation of the molecules to generate oxidized phospholipids (oxPLs), which can be detected by TEPC-15 anti-oxPL.

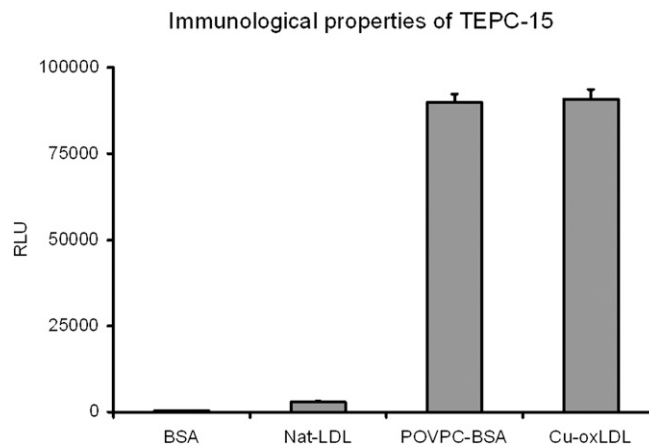

**Fig. S2.** Monoclonal anti-oxPL antibody TEPC-15 (T15; Sigma) binds to oxidation-epitope (POVPC) on oxidized LDL (oxLDL) but not to natural, unmodified LDL (Nat-LDL). Data are expressed in relative light units/100 milliseconds (RLU/100 ms) and as an average of triplicate data points. Cu-oxLDL, copper-oxidized LDL.

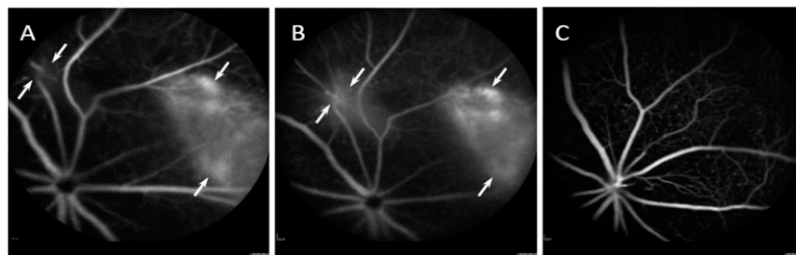

**Fig. S3.** Fundus fluorescein angiography in an early (A) or late (B) phase showing retina areas with leakage and choroidal neovascularization (arrows) in an oxLDL-injected eye. (C) Nat-LDL injected in the fellow eye served as a negative control. Overall, choroidal neovascularization developed in seven of eight mouse eyes injected with oxLDL, but none of the eight eyes injected with nat-LDL developed choroidal neovascularization. The difference in the areas of choroidal neovascularization in oxLDL-injected versus nat-LDL-injected eyes was significant ( $P < 0.01$ ).

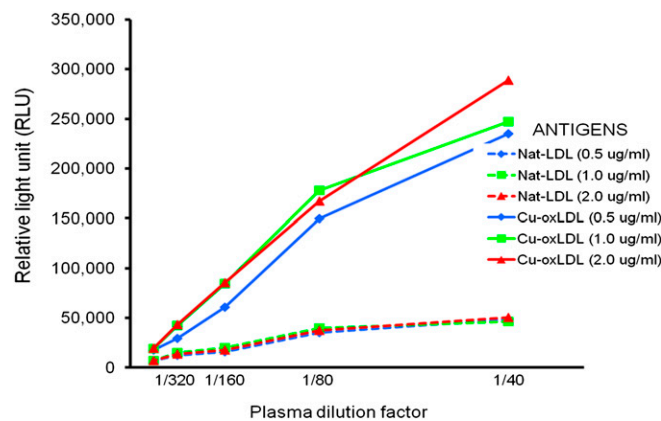

**Fig. S4.** ELISA for binding of plasma complement factor H (CFH) to the indicated coated antigens. Antigens were coated on the microtiter plate at the indicated concentrations. The serial dilutions of pooled human plasma (10 samples from blind genotypes) were added to the plate. The plasma CFH bound to the antigen was detected by biotinylated anti-CFH antibody followed by neutral avidin-alkaline phosphatase as described in *Materials and Methods*. The chemiluminescence was measured by GloMax Luminator (Promega) and expressed as RLU. The RLU for CFH binding was in linear range between 1:80–1:320 plasma dilutions when antigen concentration was at 1.0 or 2.0  $\mu\text{g}/\text{mL}$ . Cu-oxLDL, copper-oxidized LDL.

**Table S1. Quantitative PCR primers used for gene expression ARPE19 or mouse J774 cell lines**

| Gene amplified     | Forward sequence       | Reverse sequence        |
|--------------------|------------------------|-------------------------|
| Human <i>GAPDH</i> | GAGTCAACGGATTGGTCGT    | GACAAGCTTCCCCTTCTCAG    |
| Human <i>CD36</i>  | CAGAGGCTGACAACCTCACAG  | AGGGTACGGAACCAAACTCAA   |
| Human <i>MCP-1</i> | TCTGTGCCTGCTGCTCATAG   | AGATCTCCTTGCCACAATG     |
| Human <i>CCR2</i>  | AGAGGCATAGGGCAGTGAGA   | GCAGTGAGTCATCCCAAGAG    |
| Human <i>TNF</i>   | ATCAGAGGGCCTGTACCTCA   | GGAAGACCCCTCCCAGATAG    |
| Human <i>VEGF</i>  | TCCCGGTATAAGTCTGGAG    | ACAAATGCTTCTCCGCTCT     |
| Human <i>IL6</i>   | AAATTCGGTACATCCTCGACGG | GGAAGGTTCAGGTTGTTTTCTGC |
| Human <i>IL8</i>   | TCTGCAGCTCTGTGTGAAGG   | AATTTCTGTGTGGCCGAGT     |
| Mouse <i>Gapdh</i> | gtcaaggccgagaatgggaa   | tgggtcccaccctcaagtg     |
| Mouse <i>Cd36</i>  | tgtgtttggaggcattctca   | tgggttttgacatcaaaga     |
| Mouse <i>Mcp-1</i> | aggtcctgtcatgctcttg    | tctggaccattccttcttg     |
| Mouse <i>Ccr2</i>  | attctccacaccctgtttcg   | ctgcatggcctggtctaagt    |
| Mouse <i>Tnf</i>   | tcagccgatttgctatctca   | cggactccgcaaagtctaag    |
| Mouse <i>Vegfa</i> | ggtggacatcttcaggagtg   | tgatctgcatggtgatgttg    |
| Mouse <i>Il6</i>   | ggaccaagaccatccaattc   | Accacagtgaggaatgtcca    |
